# Supplementary material for: Distinct Features of Gut Microbiota in High-Altitude Tibetan and Middle-Altitude Han Hypertensive Patients
Source: Hindawi journal article supplement (doi:10.1155/2020/1957843), 2020-11-21
Supplement: f1 [file 1957843.f1.zip]

# shannon rarefaction plot

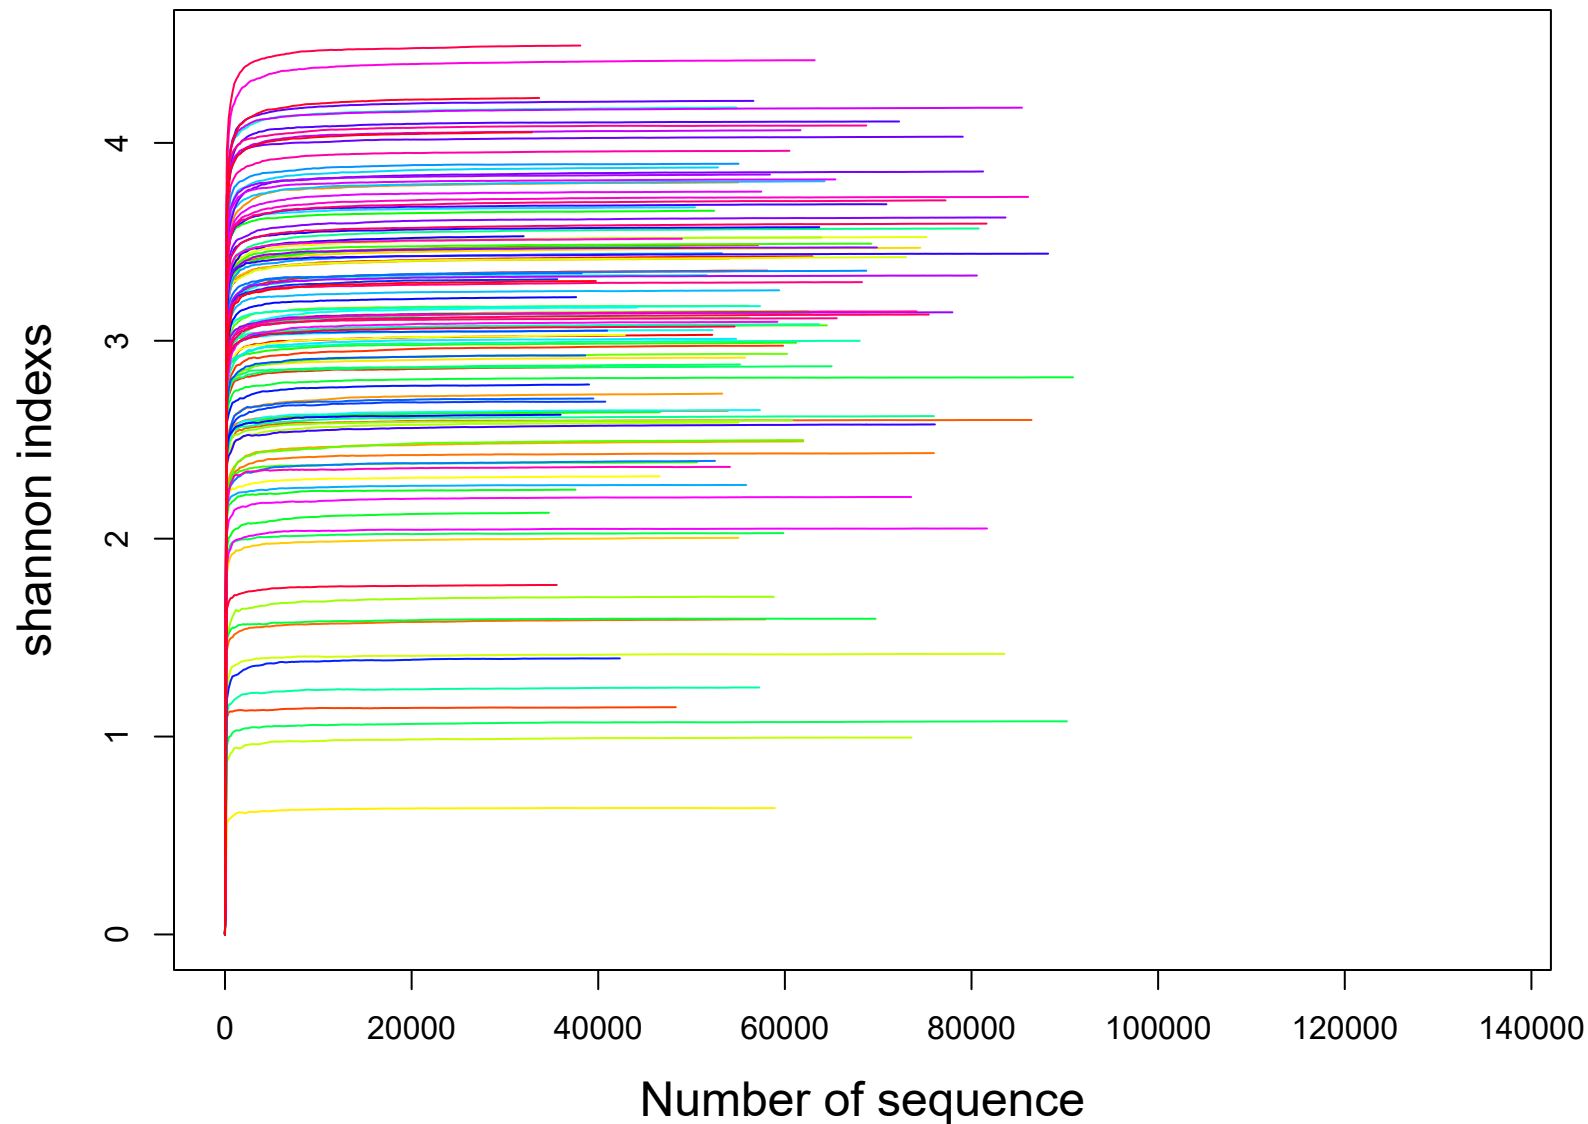

- |       |       |       |
|-------|-------|-------|
| LHH1  | MHH8  | MHH49 |
| LHH2  | MHH9  | HTH1  |
| LHH3  | MHH10 | HTH2  |
| LHH4  | MHH11 | HTH3  |
| LHH5  | MHH12 | HTH4  |
| LHH6  | MHH13 | HTH5  |
| LHH7  | MHH14 | HTH6  |
| LHH8  | MHH15 | HTH7  |
| LHH9  | MHH16 | HTH8  |
| LHH10 | MHH17 | HTH9  |
| LHH11 | MHH18 | HTH10 |
| LHH12 | MHH19 | HTH11 |
| LHH13 | MHH20 | HTH12 |
| LHH14 | MHH21 | HTH13 |
| LHH15 | MHH22 | HTH14 |
| LHH16 | MHH23 | HTH15 |
| LHH17 | MHH24 | HTH16 |
| LHH18 | MHH25 | HTH17 |
| LHH19 | MHH26 | HTH18 |
| LHH20 | MHH27 | HTH19 |
| LHH21 | MHH28 | HTH20 |
| LHH22 | MHH29 | HTH21 |
| LHH23 | MHH30 | HTH22 |
| LHH24 | MHH31 | HTH23 |
| LHH25 | MHH32 | HTH24 |
| LHH26 | MHH33 | HTH25 |
| LHH27 | MHH34 | HTH26 |
| LHH28 | MHH35 | HTH27 |
| LHH29 | MHH36 | HTH28 |
| LHH30 | MHH37 | HTH29 |
| LHH31 | MHH38 | HTH30 |
| LHH32 | MHH39 | HTH31 |
| LHH33 | MHH40 | HTH32 |
| LHH34 | MHH41 | HTH33 |
| MHH1  | MHH42 | HTH34 |
| MHH2  | MHH43 | HTH35 |
| MHH3  | MHH44 | HTH36 |
| MHH4  | MHH45 | HTH37 |
| MHH5  | MHH46 | HTH38 |
| MHH6  | MHH47 |       |
| MHH7  | MHH48 |       |
