# Supplementary material for: Distinct Features of Gut Microbiota in High-Altitude Tibetan and Middle-Altitude Han Hypertensive Patients
Source: Cardiol Res Pract. 2020 Nov 21;2020:1957843. doi: 10.1155/2020/1957843 (PMC7700061; doi:10.1155/2020/1957843)
Supplement: Supplementary Materials — Supplementary Figures S1 and S2 and Supplementary Tables S1 and S2 in the Supplementary Material for comprehensive image analysis. [file 1957843.f1.zip]

Archive with 10 entries (9 files):
- Supplemental Files/
- Supplemental Files/Supplementary Figure S1 editable.tif
- Supplemental Files/Supplementary Figure S1A.pdf
- Supplemental Files/Supplementary Figure S1B.pdf
- Supplemental Files/Supplementary Figure S2A.pdf
- Supplemental Files/Supplementary Figure S2B.pdf
- Supplemental Files/Supplementary Figure SA editable.tif
- Supplemental Files/Supplementary Materials Legends.doc
- Supplemental Files/Supplementary Table S1.doc
- Supplemental Files/Supplementary Table S2.doc
