# Supplementary figures and images for: Distinct Features of Gut Microbiota in High-Altitude Tibetan and Middle-Altitude Han Hypertensive Patients
Source: Hindawi journal article supplement (doi:10.1155/2020/1957843), 2020-11-21

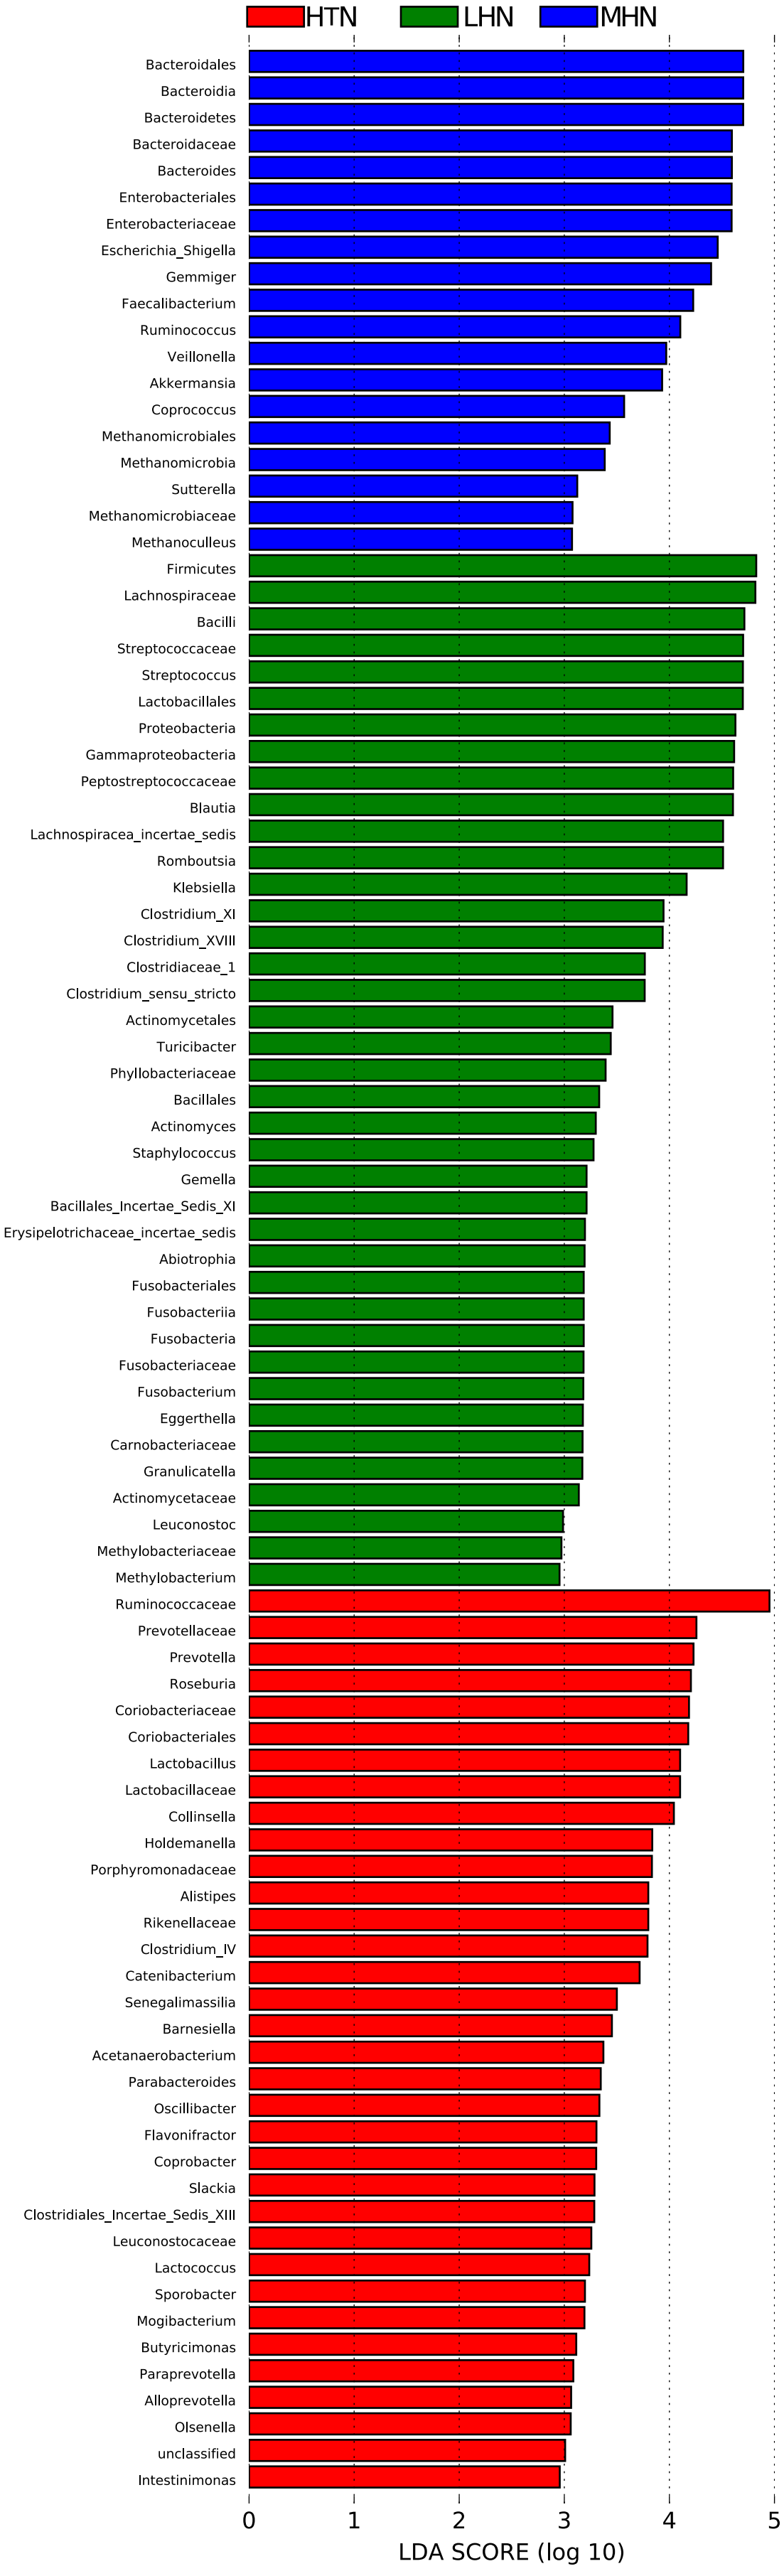

Supplement: f1 [file 1957843.f1.zip]

# shannon rarefaction plot

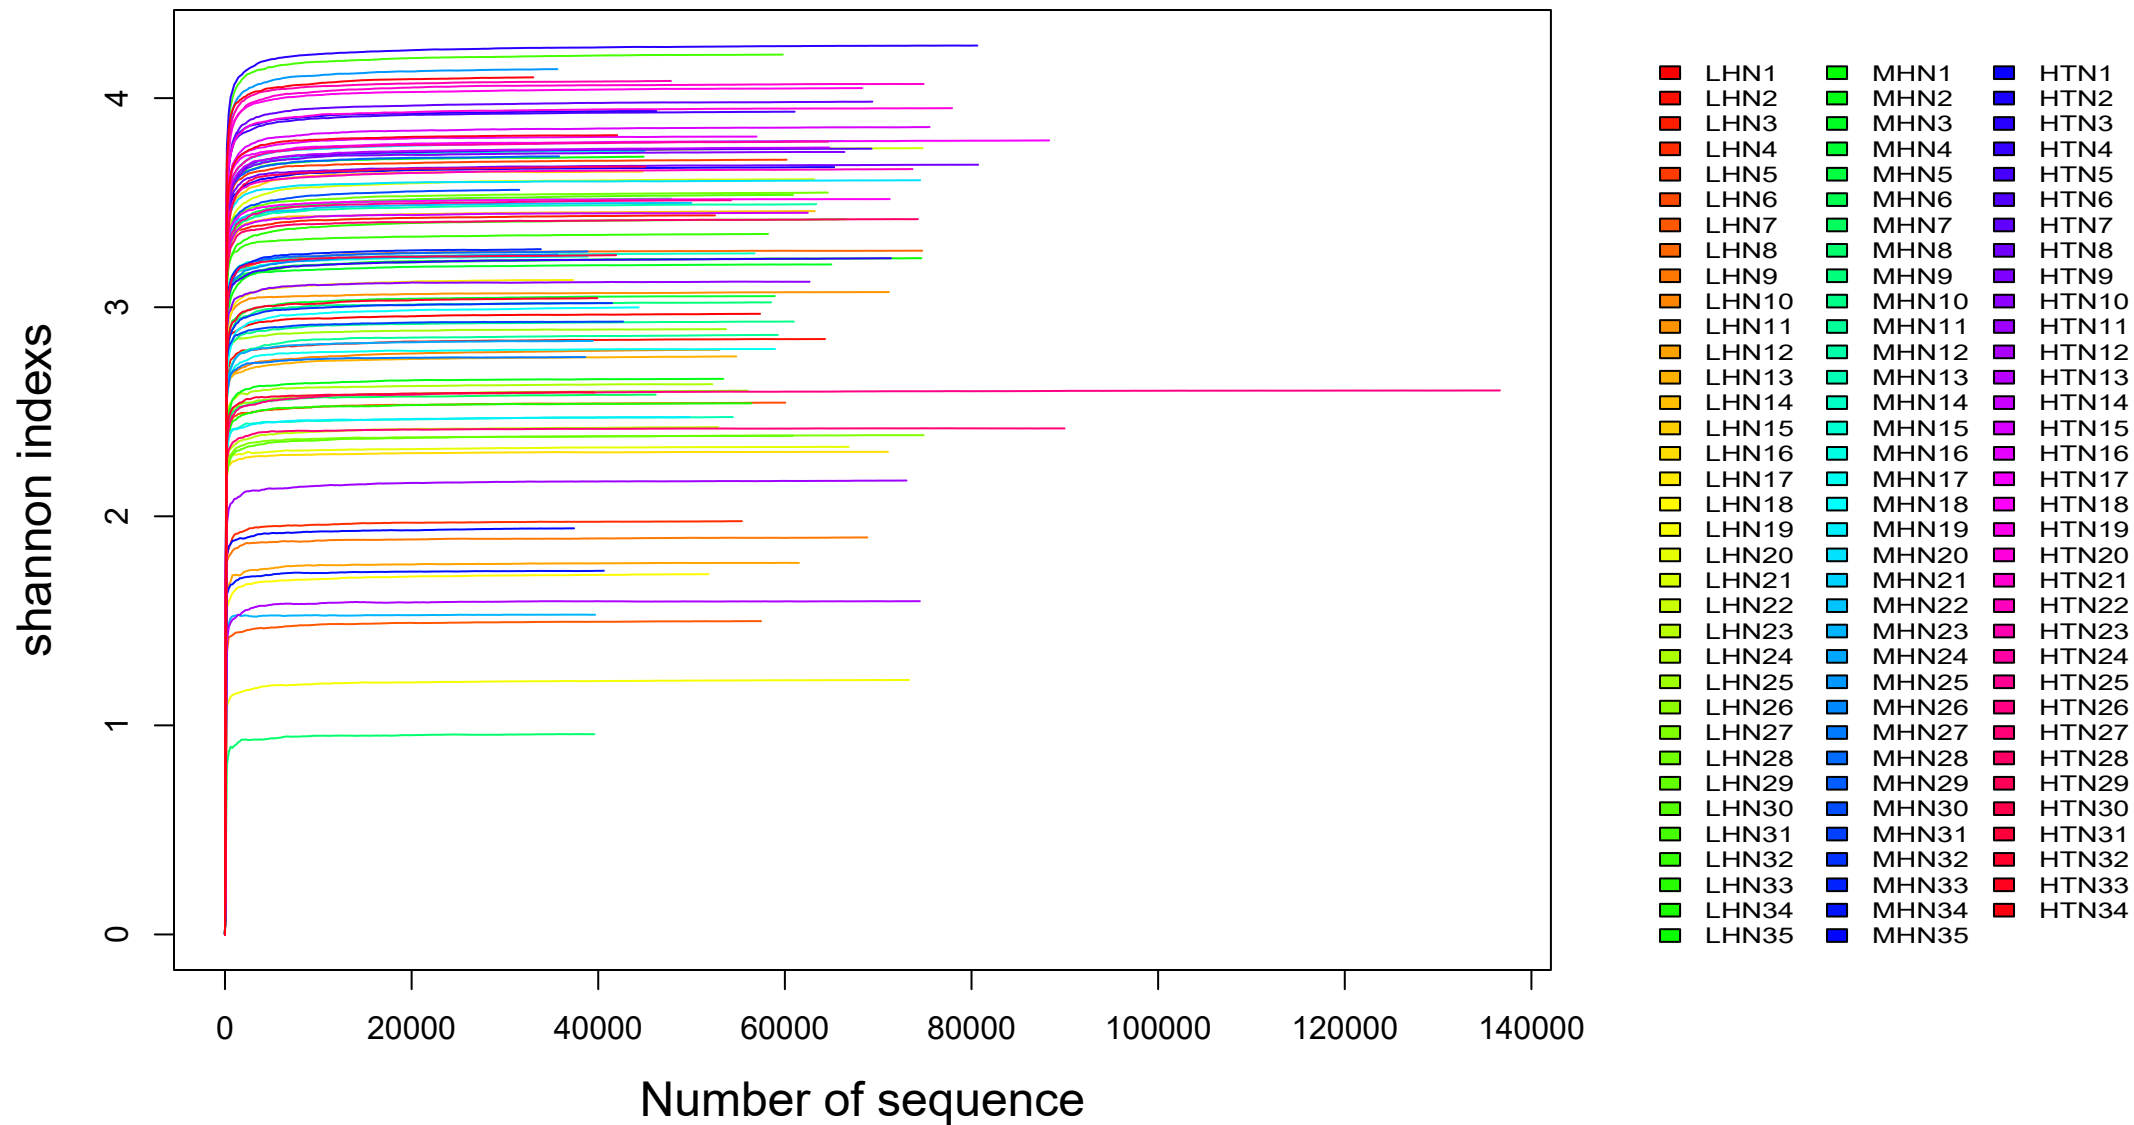

Supplement: f1 [file 1957843.f1.zip]

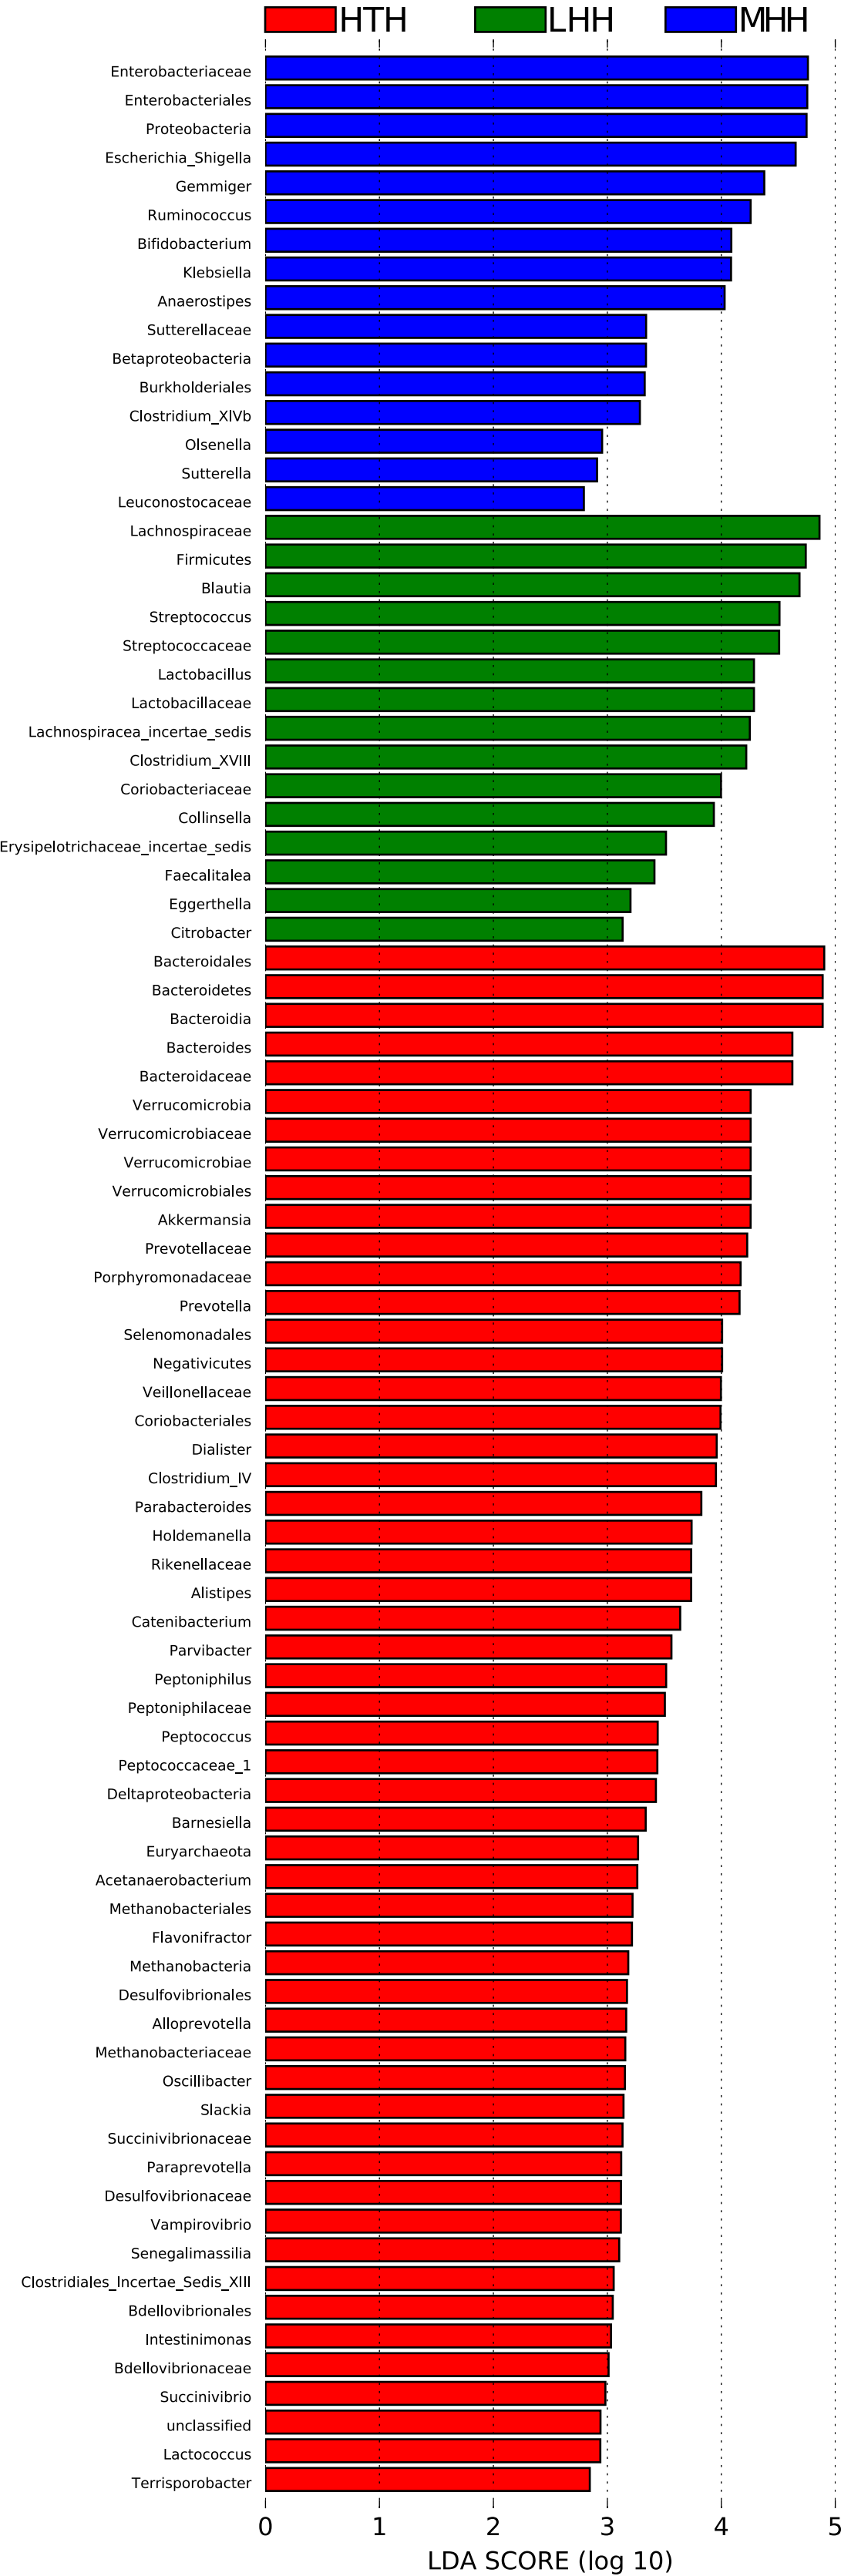

Supplement: f1 [file 1957843.f1.zip]
